# Supplementary material for: Performance of Fatty Liver Index in Identifying Non-Alcoholic Fatty Liver Disease in Population Studies. A Meta-Analysis
Source: MDPI journal article supplement (doi:10.3390/jcm10091877), 2021-04-26
Supplement: s1 [file s1]

**Table S3:** Summary estimates of the fatty liver index in identifying non-alcoholic fatty liver disease according to the lower and the higher cut-off, and imaging modality for the diagnosis of NAFLD.

| Cut-off                  | Number of subjects (number of studies) | Prevalence of non-alcoholic fatty liver disease (95% CI) | Sensitivity (95% CI) | Specificity (95% CI) | Positive predictive value (95%CI) | Negative predictive value (95%CI) | Likelihood ratio for positive results (95% CI) | Likelihood ratio for negative results (95% CI) | Diagnostic odds ratio (95% CI) |
|--------------------------|----------------------------------------|----------------------------------------------------------|----------------------|----------------------|-----------------------------------|-----------------------------------|------------------------------------------------|------------------------------------------------|--------------------------------|
| <30                      | 26,838 (9)                             | 32 (29 to 35)                                            | 81 (71 to 88)        | 65 (52 to 76)        | 53 (45 to 61)                     | 84 (80 to 89)                     | 2.32 (1.82 to 2.95)                            | 0.30 (0.24 to 0.38)                            | 7.83 (5.80 to 10.57)           |
| Ultrasound               | 23,203 (6)                             | 33 (28 to 37)                                            | 81 (69 to 89)        | 69 (54 to 81)        | 56 (47 to 65)                     | 85 (80 to 81)                     | 2.62 (1.93 to 3.68)                            | 0.27 (0.21 to 0.35)                            | 9.8 (7.6 to 12.5)              |
| Other imaging modalities | 3,635 (3)                              | 31 (29 to 32)                                            | 76 (69 to 82)        | 56 (42 to 69)        | 46 (38 to 54)                     | 84 (82 to 87)                     | 1.81 (1.31 to 2.50)                            | 0.38 (0.28 to 0.50)                            | 4.8 (2.8 to 8.3)               |
| ≥60                      | 27,176 (10)                            | 32 (29 to 35)                                            | 44 (33 to 55)        | 90 (84 to 94)        | 66 (57 to 74)                     | 76 (72 to 81)                     | 4.3 (3.4 to 6.05)                              | 0.59 (0.50 to 0.69)                            | 7.25 (5.03 to 10.45)           |
| Ultrasound               | 23,541 (7)                             | 32 (29 to 36)                                            | 44 (32 to 57)        | 92 (85 to 96)        | 71 (61 to 80)                     | 76 (71 to 81)                     | 5.38 (3.56 to 8.13)                            | 0.58 (0.49 to 0.67)                            | 9.14 (6.39 to 13.06)           |
| Other imaging modalities | 3,635 (3)                              | 31 (29 to 32)                                            | 44 (23 to 66)        | 84 (64 to 94)        | 54 (44 to 64)                     | 76 (72 to 81)                     | 2.54 (1.79 to 3.60)                            | 0.60 (0.34 to 1.05)                            | 3.97 (2.47 to 6.39)            |

95% CI, 95% confidence interval
