# Supplementary material for: Performance of Fatty Liver Index in Identifying Non-Alcoholic Fatty Liver Disease in Population Studies. A Meta-Analysis
Source: MDPI journal article supplement (doi:10.3390/jcm10091877), 2021-04-26
Supplement: s1 [file s1]

**Table S1:** PRISMA-DTA for Abstract Checklist.

| Section/topic                | #  | PRISMA-DTA for Abstracts Checklist item                                                                                                                                                                                                               | Reported on page # |
|------------------------------|----|-------------------------------------------------------------------------------------------------------------------------------------------------------------------------------------------------------------------------------------------------------|--------------------|
| <b>TITLE and PURPOSE</b>     |    |                                                                                                                                                                                                                                                       |                    |
| Title                        | 1  | Identify the report as a systematic review (+/- meta-analysis) of diagnostic test accuracy (DTA) studies.                                                                                                                                             | 3                  |
| Objectives                   | 2  | Indicate the research question, including components such as participants, index test, and target conditions.                                                                                                                                         | 3                  |
| <b>METHODS</b>               |    |                                                                                                                                                                                                                                                       |                    |
| Eligibility criteria         | 3  | Include study characteristics used as criteria for eligibility.                                                                                                                                                                                       | 3                  |
| Information sources          | 4  | List the key databases searched and the search dates.                                                                                                                                                                                                 | 3                  |
| Risk of bias & applicability | 5  | Indicate the methods of assessing risk of bias and applicability.                                                                                                                                                                                     | -                  |
| Synthesis of results         | A1 | Indicate the methods for the data synthesis.                                                                                                                                                                                                          | 3                  |
| <b>RESULTS</b>               |    |                                                                                                                                                                                                                                                       |                    |
| Included studies             | 6  | Indicate the number and type of included studies and the participants and relevant characteristics of the studies (including the reference standard).                                                                                                 | 3                  |
| Synthesis of results         | 7  | Include the results for the analysis of diagnostic accuracy, preferably indicating the number of studies and participants. Describe test accuracy including variability; if meta-analysis was done, include summary results and confidence intervals. | 3                  |
| <b>DISCUSSION</b>            |    |                                                                                                                                                                                                                                                       |                    |
| Strengths and limitations    | 9  | Provide a brief summary of the strengths and limitations of the evidence                                                                                                                                                                              | -                  |
| Interpretation               | 10 | Provide a general interpretation of the results and the important implications.                                                                                                                                                                       | 3                  |
| <b>OTHER</b>                 |    |                                                                                                                                                                                                                                                       |                    |
| Funding                      | 11 | Indicate the primary source of funding for the review.                                                                                                                                                                                                | 2                  |
| Registration                 | 12 | Provide the registration number and the registry name                                                                                                                                                                                                 | 3                  |

*Adapted From:* McInnes MDF, Moher D, Thombs BD, McGrath TA, Bossuyt PM, The PRISMA-DTA Group (2018). Preferred Reporting Items for a Systematic Review and Meta-analysis of Diagnostic Test Accuracy Studies: The PRISMA-DTA Statement. JAMA. 2018 Jan 23;319(4):388-396. doi: 10.1001/jama.2017.19163.

For more information, visit: [www.prisma-statement.org](http://www.prisma-statement.org).

Page 1 of 1
