# Supplementary material for: Performance of Fatty Liver Index in Identifying Non-Alcoholic Fatty Liver Disease in Population Studies. A Meta-Analysis
Source: MDPI journal article supplement (doi:10.3390/jcm10091877), 2021-04-26

**Figure S2: Publication bias of the prevalence of non-alcoholic fatty liver disease in each fatty liver index class.**

Fatty liver index score below 30

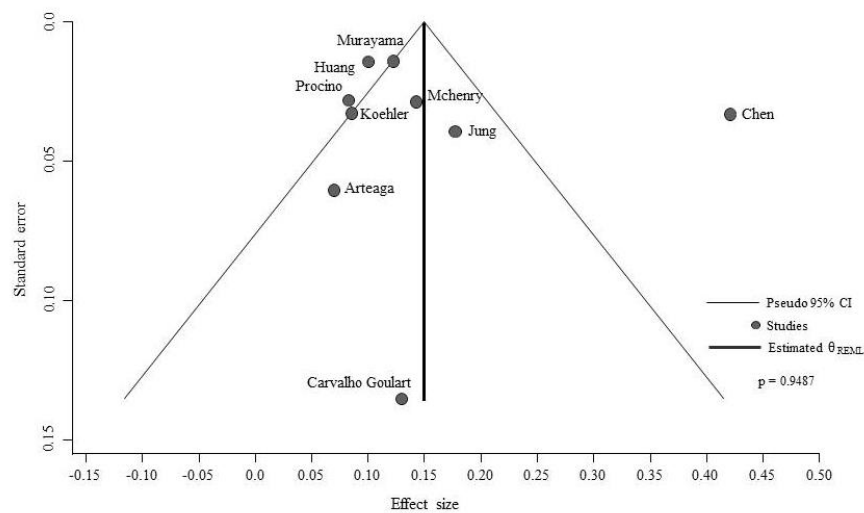

Fatty liver index score between 30 and 60

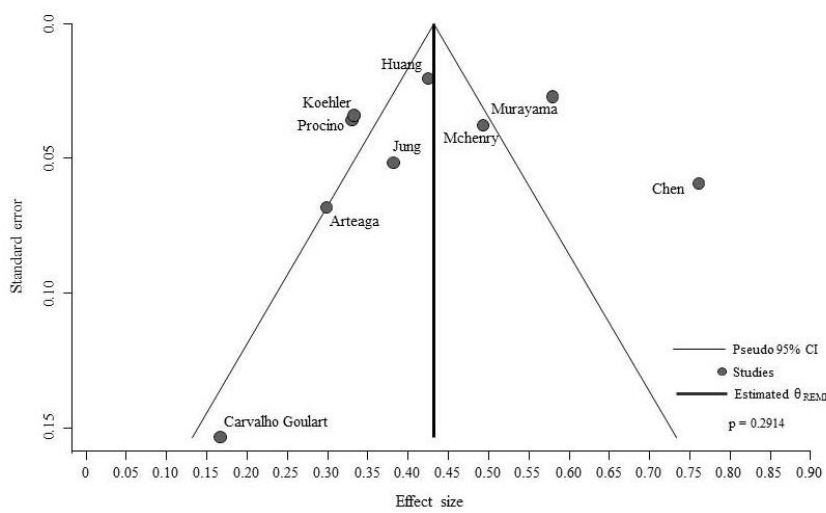

Fatty liver index score of 60 or higher

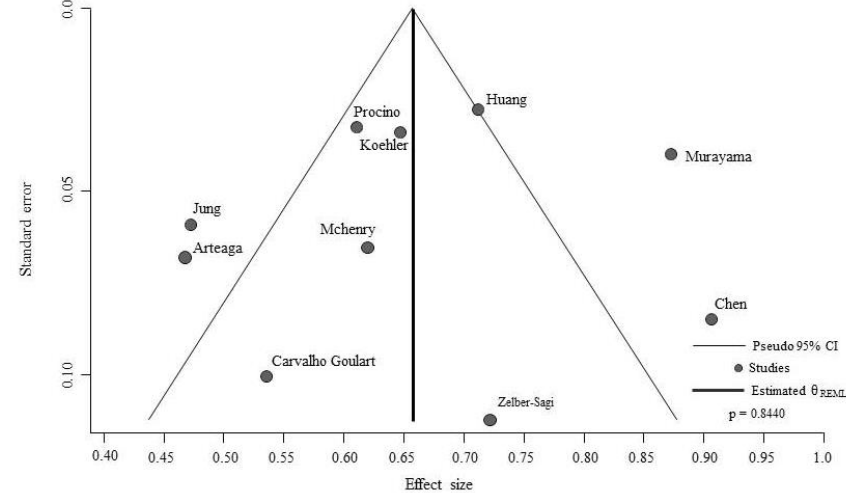

Supplement: s1 [file s1]
