# Supplementary material for: Performance of Fatty Liver Index in Identifying Non-Alcoholic Fatty Liver Disease in Population Studies. A Meta-Analysis
Source: MDPI journal article supplement (doi:10.3390/jcm10091877), 2021-04-26
Supplement: s1 [file s1]

**Table S4:** Summary of risk of bias and applicability concerns: review authors' judgments about each domain for each study included.

| First Author,<br>year       | Risk of bias         |               |                               |                       | Applicability concerns   |               |                               |
|-----------------------------|----------------------|---------------|-------------------------------|-----------------------|--------------------------|---------------|-------------------------------|
|                             | Patient<br>selection | Index<br>test | Referen<br>ce<br>standar<br>d | Flow<br>and<br>timing | Patient<br>selectio<br>n | Index<br>test | Referen<br>ce<br>standar<br>d |
| Koehler, 2013 [12]          | Low                  | Low           | High                          | Low                   | High                     | Low           | High                          |
| Zelber-Sagi, 2013 [13]      | Low                  | Low           | High                          | Unclear               | Low                      | Low           | Low                           |
| Arteaga, 2014 [14]          | Low                  | Low           | High                          | Low                   | Low                      | Low           | High                          |
| Carvalho Goulart, 2015 [15] | Unclear              | Low           | High                          | Low                   | Low                      | Low           | High                          |
| Huang, 2015 [16]            | Unclear              | Low           | High                          | Unclear               | Low                      | Low           | High                          |
| Procino, 2018 [17]          | Low                  | Low           | High                          | Unclear               | Low                      | Low           | High                          |
| Chen, 2020 [18]             | Unclear              | Low           | High                          | Unclear               | Low                      | Low           | Low                           |
| Jung, 2020 [19]             | Unclear              | Low           | High                          | Unclear               | Low                      | Low           | High                          |
| McHenry, 2020 [20]          | Low                  | Low           | High                          | Unclear               | Low                      | Low           | High                          |
| Murayama, 2021 [21]         | Unclear              | Low           | High                          | Unclear               | Low                      | Low           | High                          |
