# Supplementary figures and images for: Performance of Fatty Liver Index in Identifying Non-Alcoholic Fatty Liver Disease in Population Studies. A Meta-Analysis
Source: MDPI journal article supplement (doi:10.3390/jcm10091877), 2021-04-26

**Figure S1: Flow-chart of the systematic review.**

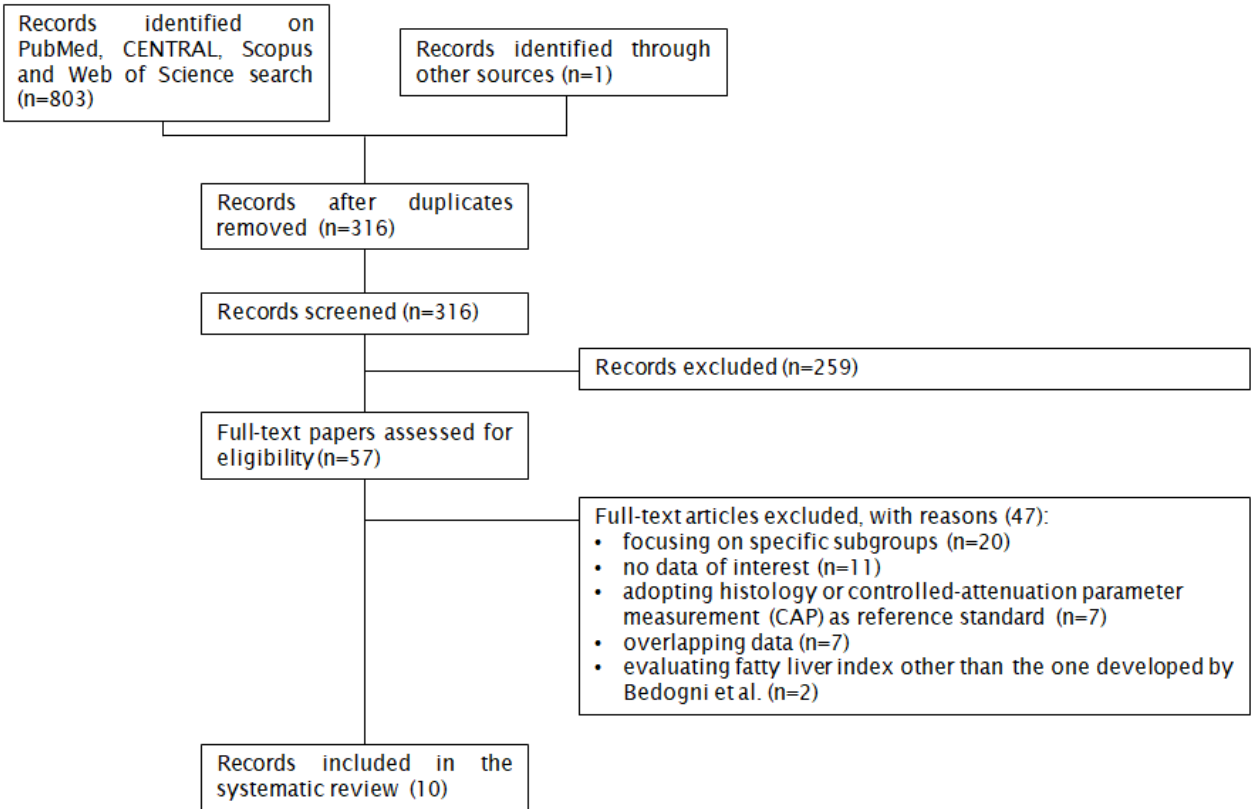

Supplement: s1 [file s1]
